1 **Title Page**

2 **Title: Social Network Analysis of COVID-19 Transmission in Karnataka, India**

3 **Authors: S. Saraswathi<sup>1</sup>, A. Mukhopadhyay<sup>2</sup>, H. Shah<sup>3</sup>, and T.S. Ranganath<sup>1</sup>**

4 **Affiliations:**

5 1. Department of Community Medicine, Bangalore Medical College and Research

6 Institute, Bangalore, Karnataka, India.

7 2. Independent researcher, formerly with Department of Community Medicine, Bangalore

8 Medical College and Research Institute Karnataka, India.

9 3. Independent researcher, formerly with Henry Ford Health System, Detroit, Michigan,

10 USA.

11 Corresponding author: A. Mukhopadhyay

12 Email address: [dr.amukho@gmail.com](mailto:dr.amukho@gmail.com)

13

14 Word count (summary): 186

15 Word count (text): 2593

16 No. of figures: Five (5)

17 No. of tables: Nil

18 Supplementary files: One (1)

19

20 **Running title:** Network Analysis of Covid-19 in India

21

22

23

24 **Summary**

25 We used social network analysis (SNA) to study the novel coronavirus (COVID-19) outbreak in  
26 Karnataka, India, and assess the potential of SNA as a tool for outbreak monitoring and control.  
27 We analyzed contact tracing data of 1147 Covid-19 positive cases (mean age 34.91 years,  
28 61.99% aged 11–40, 742 males), anonymized and made public by the government. We used  
29 software tools Cytoscape and Gephi to create SNA graphics and determine network attributes of  
30 nodes (cases) and edges (directed links, determined by contact tracing, from source to target  
31 patients). Outdegree was 1–47 for 199 (17.35%) nodes, and betweenness 0.5–87 for 89 (7.76%)  
32 nodes. Men had higher mean outdegree and women, higher betweenness. Delhi was the  
33 exogenous source of 17.44% cases. Bangalore city had the highest caseload in the state (229,  
34 20%), but comparatively low cluster formation. Thirty-four (2.96%) “super-spreaders”  
35 (outdegree $\geq$ 5) caused 60% of the transmissions. Real-time social network visualization can allow  
36 healthcare administrators to flag evolving hotspots and pinpoint key actors in transmission.  
37 Prioritizing these areas and individuals for rigorous containment could help minimize resource  
38 outlay and potentially achieve a significant reduction in COVID-19 transmission.

39  
40 **Keywords:** Social network analysis; Contact tracing; Disease Transmission, Infectious; Covid-  
41 19; SARS-CoV-2; Infection

42

43

44

45

46

## 47 **Social Network Analysis of COVID-19 Transmission in Karnataka, India**

### 48 **Introduction**

49 Karnataka, a southern state of India, reported its first case of coronavirus disease (COVID-19)  
50 caused by the severe acute respiratory syndrome coronavirus 2 (SARS-CoV-2), on 9 March  
51 2020. The state has had fewer cases than other Indian states and has deployed modern  
52 technology tools as part of its logistics and containment measures[1,2]. As of 17 May 2020,  
53 Karnataka had declared 1147 diagnosed cases, 38 deaths, and 18648 individuals under  
54 observation[3]. Among the 1147, there were 600 active cases, 509 who had recovered, and 37  
55 who died due to COVID (a fatality rate of 3.2%); one person died by suicide after being  
56 diagnosed. Social network analysis (SNA) is a technique to study the configurations of social  
57 relations between individuals or other social units. Social network models can be used to  
58 measure variables that shape relationships between social actors, and the extent to which they  
59 affect health-related outcomes[4,5]. Researchers are exploring the application of SNA to various  
60 facets of the COVID-19 pandemic, such as the role of public figures in communication[6], and  
61 clustering patterns within the broader patient network[7].

62 The Karnataka healthcare task force has relied primarily on contact tracing to limit the spread of  
63 COVID-19. To aid in accelerating our understanding of the transmission characteristics of this  
64 novel virus, we applied SNA to the contact tracing data of COVID-19 patients from Karnataka  
65 State, with two main research objectives in mind: First, can SNA improve our understanding of  
66 the transmission patterns of SARS-CoV-2? Second, can SNA produce actionable findings that  
67 can help in timely control of the spread of this disease?

68

69

## 70 **Methods**

71 We performed social network analysis (SNA) on the anonymized contact tracing data of 1147  
72 SARS-CoV-2 positive patients, uploaded to the public domain by the state government of  
73 Karnataka[3]. Our analysis included all cases reported positive for COVID-19 from 9 March to  
74 17 May 2020, spanning the period from detection of the first Covid-19 case in the state to the  
75 end of phase-3 of the preventive lockdown declared by the government. We collected  
76 anonymized contact tracing data from daily government bulletins, and tabulated and summarized  
77 relevant demographic details such as age, district of residence, and history of travel, using  
78 Microsoft Excel. We created nodes and links tables in Excel, with each node representing a  
79 patient, and each link (edge), a confirmed contact between a source and a target patient. We  
80 imported this dataset into Gephi version 0.9.2 and applied the following sequence of layout  
81 algorithms: YiFan Hu Proportional, Fruchterman Reingold, and ‘No Overlap,’ to achieve a  
82 visual representation in which the more connected nodes are placed centrally, and ones with  
83 lower connectivity are placed towards the periphery of the network[8].

84 We wanted to use the capabilities of the two leading software tools[9], Gephi and Cytoscape, and  
85 make use of the features missing in one but available in the other. The use of Gephi’s network  
86 analysis tools results in the data for nodes and edges being populated with additional attribute  
87 variables. These values, such as node betweenness and edge betweenness, can then be displayed  
88 as visual features of the network elements in other software tools such as Cytoscape[10]. We  
89 reformatted the data exported from Gephi to make it compatible with the data model acceptable  
90 to Cytoscape version 3.8.0, which we used to create network graphics highlighting pertinent  
91 demographic characteristics of the nodes. Layout algorithms provided in Cytoscape were applied  
92 in the following sequence: Compound Spring Embedder (CoSE) and yFiles Remove Overlap,

93 followed by a few manual adjustments to improve clarity. Network attributes generated by Gephi  
94 were analyzed using MS Excel to explain relevant aspects of the network and its components.

### 95 **Important definitions**

96 **Degree centrality** is a measure of the number of social connections or links that a node has. It is  
97 expressed as an integer or count[11]. The indegree of a node is the number of incoming links to  
98 it from source nodes and refers to the number of infectious patients who had confirmed contact  
99 with a given target patient. Outdegree is the number of links to target nodes from a source node  
100 and is a measure of the number of secondary cases infected by a given patient.

101 **Betweenness centrality** is a measure of the number of times a node appears on the shortest path  
102 between other nodes[12]. It reflects the role a patient plays in creating a bridge of infectious  
103 transmission between patients who would not have had direct contact with each other.

104 **Closeness centrality** is the average of the shortest path lengths from a node to every other node  
105 in the network. We used harmonic closeness to measure closeness centrality due to the presence  
106 of unconnected nodes[13].

107 **Edge betweenness** is the number of the shortest paths that go through an edge in a graph or  
108 network, with a high score indicative of a bridge-like connection between two parts of a network,  
109 crucial to transmission between many pairs of nodes[14].

110 **Clustering coefficient** measures the degree to which nodes in a graph tend to cluster  
111 together[15].

112 **Network density** is the number of existing ties between nodes, divided by the number of  
113 possible ties[16].

114 **Network diameter** is the shortest path between the two most distant nodes in a network[15].

115 **Mean path length** is the average of the shortest path lengths between all possible node pairs[15].

116 **Network component** is an island of interlinked nodes that are disconnected from other nodes of  
117 the network. Many networks consist of one large component, sometimes together with several  
118 smaller ones and singleton actors[5].

119 **Super-spreader** (operational definition): Any node with an outdegree  $\geq 5$  was considered a  
120 super-spreader. Individuals represented by these nodes would have infected five or more  
121 contacts.

## 122 **Results**

123 Demography: We analyzed 1147 patients (742 males, 64.69%), aged 34.91 years on average,  
124 most of whom (711, 61.99%) belonged in the 11–40 years age range. Most deaths, however,  
125 occurred among older patients, with the highest mortality percentage (10/34, 29.41%) in patients  
126 aged over 70 years (Supplementary Figure S1).

127 Network parameters (Supplementary Table S1): We found 948 nodes with zero outdegree. The  
128 remaining 199 (17.35%) nodes had an outdegree range of 1–47 and were the source of infection  
129 to 657 targets through 706 links (edges). Among the target nodes, 36 had indegree  $>1$  (range 2–  
130 5), implying more than one source. There were 490 nodes with zero indegree, of which 383 had  
131 zero outdegree. These were isolated nodes with degree centrality value zero. The range of  
132 betweenness centrality was 0.5–87 for 89 (7.76%) nodes. The network had 143 nodes with a  
133 harmonic closeness centrality (HCC) of one and 56 with HCC between zero and one. Our  
134 network density was 0.001, diameter was 4, and clustering coefficient was 0.004.

135 Men had a higher mean outdegree (0.628, M vs 0.593, F) and women, higher betweenness  
136 (0.573, F vs 0.412, M, Supplementary Table S2). The 95<sup>th</sup> percentile values for outdegree and  
137 betweenness were 3 and 2, respectively. There were 77 (6.71% of 1147) nodes with outdegree  
138  $\geq 3$ , and combined, they accounted for 556 (78.75% of 706) edges. More than two-thirds of these

139 (54, 70.13%) were men. The average HCC for the 77 nodes with  $\text{outdegree} \geq 3$  was 0.887,  
140 compared to 0.161 for the entire network. Of the 59 nodes with  $\text{betweenness} \geq 2$ , more than half  
141 (33, 55.93%) were men, though women had a higher mean betweenness overall.

142 We noted 34 super-spreaders with  $\text{outdegree} \geq 5$ , with a cumulative outdegree of 410, and after  
143 deducting 17 duplicate edges for target nodes with  $\text{indegree} > 1$ , they accounted for 393 (59.81%)  
144 of the 657 target cases.

145 The aggregate network graphic (Figure 1), created using Gephi, shows nodes representing  
146 patients, and components representing case clusters. The nodes are colored according to district  
147 and sized by outdegree, making the larger nodes represent individuals who infected a greater  
148 number of targets. Bangalore had the highest number of cases, followed by Belagavi,  
149 Kalaburagi, and Mysuru (Supplementary Table S3). The largest node is in Mysuru, denoting a  
150 patient who infected 47 target nodes, at the center of a major component. Transmission between  
151 districts was limited, occurring chiefly from Mysuru to Mandya, a geographically adjacent city.

152 The network figure also has two large-sized gray nodes that represent two patients with  
153 outdegree 29 and 25, from districts Vijayapura and Uttara Kannada, respectively.

154 The network contained 93 clusters of connected nodes (components), of which 37 components,  
155 made up of five or more nodes each, had more than half of all the nodes (613, 53.44%) and four-  
156 fifths of the links (611, 86.54%) concentrated within them (Figure 2).

157 Figure 3 shows the age and sex distribution of cases in the network. Nodes are colored by age  
158 group and sized by outdegree. Figure 4 shows nodes colored by source of infection and sized by  
159 betweenness centrality. We have considered patients with a history of travel from Delhi in a  
160 separate category as their count was comparable to the combined number of travelers from all

161 other states of India. It is noteworthy that travelers from abroad did not contribute to the  
162 formation of any major cluster.

163 Comparing figures 3 (nodes sized by outdegree) and 4 (nodes sized by betweenness), we find  
164 that in clusters with nodes that had multiple interconnections, relatively low outdegree, and high  
165 betweenness, the key nodes were females. This indicates that women played a significant  
166 bridging role. This differs from clusters with edges radiating from a central node with high  
167 outdegree and low betweenness, where typically, a young male was the nidus. The largest and  
168 second-largest components illustrate this difference in transmission (Figure 5). The largest  
169 component had 75 nodes and 76 links, and the second-largest component had 45 nodes and 50  
170 links. The largest cluster originated in the district of Mysuru; its source node was a male with  
171 high outdegree who spread the infection to many contacts. However, secondary transmission  
172 from those contacts was limited. This cluster is star shaped. The second-largest component  
173 resembles a spiderweb with multiple interconnected nodes and many female actors. This cluster  
174 was in Belagavi, and its network density was nearly twice that of the largest cluster (.025 vs.  
175 .014), with a shorter average path length (1.314 vs. 1.321).

## 176 **Discussion**

177 Our study reveals that most cases of COVID-19 in Karnataka were young and middle-aged men.  
178 Deaths, however, occurred overwhelmingly among elderly patients. Close to one-third of those  
179 aged  $\geq 60$  years (35/112, 31.25%) were secondary cases who had contracted COVID-19 from  
180 younger contacts, and for another 25% (28/112), the source of infection was unknown with no  
181 history of travel to or from hotspots. It is plausible that these latter were also contacts of SARS-  
182 CoV-2 carriers. The age and sex profile of our study set matches nationwide surveillance data



183 from India, reported by Abraham et al., with median age and age-distribution close to our  
184 sample, and a similar high attack rate in males[17].

185 Bangalore, the capital of Karnataka, is a densely populated metropolis, housing one-sixth of  
186 Karnataka's population in one per cent of its area[18,19]. The city airport is a major transit point  
187 for domestic and international travelers. These factors may explain Bangalore's relatively heavy  
188 burden (229/1147) of COVID-19 cases. Despite accounting for nearly a fifth of the state's  
189 caseload, however, our network analyses (Figure 1 and Supplementary Tables S3 and S4) show  
190 that Bangalore did not have notably large clusters compared to other districts. Most of the cases  
191 detected here were isolated nodes, many of whom were returnees from abroad. Bangalore's low  
192 transmission may be due to the disciplined observance of lockdown measures, and rigorous  
193 contact tracing and quarantine activities by its healthcare workforce[20,21].

194 The presence of two large nodes (where size denotes outdegree) in districts that had a minor  
195 contribution to the total caseload (Figure 1) points to the risk of cluster formation even in  
196 relatively unaffected areas if distancing measures are not followed scrupulously.

197 Shortly after the World Health Organization confirmed the novel Coronavirus as the cause of the  
198 outbreak in China[22], health authorities started precautionary screening at Bangalore's  
199 international airport, and quarantining passengers arriving from areas of concern[23]. These  
200 early steps may explain why we found no major clusters originating from international travelers.

201 Conversely, we noted several clusters comprised of people with a history of travel to the national  
202 capital, Delhi (Figure 4 and Supplementary Tables S3 and S4). By 19 April 2020, the entire city  
203 of Delhi had been declared a COVID-19 hotspot[24] in the wake of a mass religious gathering  
204 that was found to be linked to nearly a third of the country's caseload earlier in the month[25].  
205 Our second-largest cluster was traced to a patient who had a history of attending this religious

206 gathering in Delhi. Clusters of cases that originated from Delhi tended to be closely  
207 interconnected, with women playing an active transmission role. This could reflect close  
208 community ties between these individuals, or residence in underprivileged areas where strict  
209 social distancing may not have been observed.

210 Most of the clusters in our network showed a man with high outdegree as the nidus. Women, on  
211 the other hand, played an important role in transmission by bridging multiple nodes within  
212 clusters, even though men outnumbered women in the 95<sup>th</sup> percentile region of betweenness.  
213 Further study is warranted into the behavioral characteristics of men and women that drive these  
214 differences.

215 The low density of our network, the presence of 948 nodes with zero outdegree, and the fact that  
216 only 34 source cases had infected close to two-thirds of all target cases, indicate that community  
217 transmission was negligible. Bi et al. reported a similar transmission pattern from Shenzhen,  
218 China. In their cohort, 8.9% of the cases had caused 80% of all infections[26]. Network analysis  
219 of COVID-19 patients in Henan, China, by Wang et al.[7] revealed a similar non-uniform pattern  
220 of clustering (208/1105 patients in clusters) with a skewed distribution of patients in different  
221 cities. Their findings also indicate a strong correlation of confirmed cases with travel to Wuhan  
222 (the epicentre of the pandemic), which is concordant with our observation that a significant  
223 proportion (17.44%) of the Karnataka patients had traveled to Delhi.

#### 224 **Limitations**

225 Our SNA findings may not universally reflect field realities. Some findings such as eccentricity  
226 and mean path length are theoretical constructs computed by software algorithms, but in practice,  
227 these metrics remain indeterminate as our network had very few inter-district connections and  
228 many isolated nodes and components. Our dataset included many patients with contact tracing

229 still under investigation at the time of analysis. We were not able to analyze the role of type and  
230 duration of contact, as the data for these were not available for many patients.

## 231 **Conclusion**

232 Our conventional analysis indicates that senior citizens, due to their high mortality risk with  
233 COVID-19, should be advised strict social distancing, and older patients from rural or  
234 underserved areas should be preemptively transferred to tertiary centres with intensive care  
235 facilities. Our network analysis suggests that geographical, demographical, and community  
236 characteristics could be influencing the spread of COVID-19. Gender influences cluster  
237 morphology, with men seeding the clusters and women propagating them. Furthermore, our SNA  
238 highlights the need to maintain an accurate database with ongoing recording of contact tracing  
239 data using a uniform format. Tools for real-time visualization of social networks can provide  
240 actionable information on the evolution and spread of the disease. Such methods could aid local  
241 government bodies in formulating control measures tailored to network characteristics of each  
242 locality. Social network analysis can flag evolving networks with high densities and pinpoint  
243 nodes with high outdegree, betweenness, and closeness scores, which imply an active role in the  
244 transmission and bridging of infection. Public health authorities could prioritize these clusters  
245 and individuals for rigorous containment, which could help minimize resource outlay and  
246 potentially significantly reduce the spread of COVID-19.

247

## 248 **Author Contributions**

249 S. Saraswathi: Conceptualization, Study Design, Data Collection

250 A. Mukhopadhyay and H. Shah: Data Analysis

251 All authors: Writing, Editing, Review and Final Approval of Manuscript

252 **Disclaimer, Funding, and Conflict of Interest**

253 We used anonymized secondary data available in the public domain, from a government website,  
254 the copyright policy of which indicates that the data may be used for publication subject to  
255 proper acknowledgment. We received no financial support for this study. We have no conflict of  
256 interest to declare.

257 **References**

- 258 1. **The New Indian Express.** *Karnataka fares well in war against COVID-19.*  
259 ([https://www.newindianexpress.com/states/karnataka/2020/apr/14/karnataka-fares-well-in-](https://www.newindianexpress.com/states/karnataka/2020/apr/14/karnataka-fares-well-in-war-against-covid-19-2129751.html)  
260 [war-against-covid-19-2129751.html](https://www.newindianexpress.com/states/karnataka/2020/apr/14/karnataka-fares-well-in-war-against-covid-19-2129751.html)). Accessed 17 May 2020.
- 261 2. **The Times of India.** *New tech solutions aiding Karnataka's battle against Covid-19 |*  
262 *Bengaluru News - Times of India.* ([https://timesofindia.indiatimes.com/city/bengaluru/new-](https://timesofindia.indiatimes.com/city/bengaluru/new-tech-solutions-aiding-karnatakas-battle-against-covid-19/articleshow/75782619.cms)  
263 [tech-solutions-aiding-karnatakas-battle-against-covid-19/articleshow/75782619.cms](https://timesofindia.indiatimes.com/city/bengaluru/new-tech-solutions-aiding-karnatakas-battle-against-covid-19/articleshow/75782619.cms)).  
264 Accessed 17 May 2020.
- 265 3. *Health Department Bulletin - COVID-19 INFORMATION PORTAL.*  
266 (<https://covid19.karnataka.gov.in/new-page/Health%20Department%20Bulletin/en>).  
267 Accessed 18 May 2020.
- 268 4. **Newman MEJ.** The Structure and Function of Complex Networks. *SIAM Review* 2003; **45**:  
269 167–256.
- 270 5. **O'Malley AJ, Marsden PV.** The Analysis of Social Networks. *Health services & outcomes*  
271 *research methodology* 2008; **8**: 222–269.

- 272 6. **Yum S.** Social Network Analysis for Coronavirus (COVID-19) in the United States. *Social*  
273 *Science Quarterly* Published online: doi:10.1111/ssqu.12808.
- 274 7. **Wang P, et al.** Statistical and network analysis of 1212 COVID-19 patients in Henan, China.  
275 *International Journal of Infectious Diseases* 2020; **95**: 391–398.
- 276 8. **Bastian M, Heymann S, Jacomy M.** Gephi: An Open Source Software for Exploring and  
277 Manipulating Networks. *International AAAI Conference on Web and Social Media; Third*  
278 *International AAAI Conference on Weblogs and Social Media* 2009; Published online: 2009.
- 279 9. **Bhatia R.** *Top 7 Network Analysis Tools For Data Visualisation. Analytics India Magazine.*  
280 2018(<https://analyticsindiamag.com/top-7-network-analysis-tools-for-data-visualisation/>).  
281 Accessed 18 May 2020.
- 282 10. **Shannon P, et al.** Cytoscape: a software environment for integrated models of biomolecular  
283 interaction networks. *Genome research* Cold Spring Harbor Laboratory Press, 2003; **13**:  
284 2498–2504.
- 285 11. *Degree Centrality - an overview | ScienceDirect Topics.*  
286 (<https://www.sciencedirect.com/topics/computer-science/degree-centrality>). Accessed 14  
287 May 2020.
- 288 12. *Betweenness Centrality - an overview | ScienceDirect Topics.*  
289 (<https://www.sciencedirect.com/topics/computer-science/betweenness-centrality>). Accessed  
290 14 May 2020.

- 291 13. *Closeness Centrality - an overview | ScienceDirect Topics*.  
292 (<https://www.sciencedirect.com/topics/computer-science/closeness-centrality>). Accessed 3  
293 June 2020.
- 294 14. **Girvan M, Newman MEJ**. Community structure in social and biological networks.  
295 *Proceedings of the National Academy of Sciences of the United States of America* The  
296 National Academy of Sciences, 2002; **99**: 7821–7826.
- 297 15. **Ouyang F, Reilly C**. *Terminology - Social Network Analysis*.  
298 (<https://sites.google.com/a/umn.edu/social-network-analysis/terminology>). Accessed 3 June  
299 2020.
- 300 16. **Hanneman RA, Riddle M**. *Introduction to Social Network Methods: Chapter 8: More*  
301 *Properties of Networks and Actors*.  
302 ([https://faculty.ucr.edu/~hanneman/nettext/C8\\_Embedding.html](https://faculty.ucr.edu/~hanneman/nettext/C8_Embedding.html)). Accessed 3 June 2020.
- 303 17. **Abraham P, et al**. Laboratory surveillance for SARS-CoV-2 in India: Performance of  
304 testing & descriptive epidemiology of detected COVID-19, January 22 - April 30, 2020.  
305 *Indian Journal of Medical Research* Published online: doi:10.4103/ijmr.IJMR\_1896\_20.
- 306 18. *Bangalore (Bengaluru) District : Census 2011-2020 data - Corona Virus | Covid 19 Data*.  
307 (<https://www.census2011.co.in/census/district/242-bangalore-.html>). Accessed 1 June 2020.
- 308 19. *Karnataka Population 2011-2020 Census - Corona Virus | Covid 19 Data*.  
309 (<https://www.census2011.co.in/census/state/karnataka.html>). Accessed 1 June 2020.

- 310 20. **The Times of India.** *Welcome indicator: Only 2% of Covid-19 beds occupied in Karnataka /*  
311 *Bengaluru News - Times of India.*  
312 ([https://timesofindia.indiatimes.com/city/bengaluru/welcome-indicator-only-2-of-covid-19-](https://timesofindia.indiatimes.com/city/bengaluru/welcome-indicator-only-2-of-covid-19-beds-occupied-in-karnataka/articleshow/75653647.cms)  
313 [beds-occupied-in-karnataka/articleshow/75653647.cms](https://timesofindia.indiatimes.com/city/bengaluru/welcome-indicator-only-2-of-covid-19-beds-occupied-in-karnataka/articleshow/75653647.cms)). Accessed 2 June 2020.
- 314 21. **News18.** *Trace, Test and Treat: Armed with 3Ts, How Bengaluru is on Course to Flattening*  
315 *the Curve of Covid-19.* 2020([https://www.news18.com/news/india/trace-test-and-treat-](https://www.news18.com/news/india/trace-test-and-treat-armed-with-3ts-how-bengaluru-is-on-course-to-flattening-the-curve-of-covid-19-2619117.html)  
316 [armed-with-3ts-how-bengaluru-is-on-course-to-flattening-the-curve-of-covid-19-](https://www.news18.com/news/india/trace-test-and-treat-armed-with-3ts-how-bengaluru-is-on-course-to-flattening-the-curve-of-covid-19-2619117.html)  
317 [2619117.html](https://www.news18.com/news/india/trace-test-and-treat-armed-with-3ts-how-bengaluru-is-on-course-to-flattening-the-curve-of-covid-19-2619117.html)). Accessed 2 June 2020.
- 318 22. **World Health Organization.** *WHO Statement Regarding Cluster of Pneumonia Cases in*  
319 *Wuhan, China.* ([https://www.who.int/china/news/detail/09-01-2020-who-statement-](https://www.who.int/china/news/detail/09-01-2020-who-statement-regarding-cluster-of-pneumonia-cases-in-wuhan-china)  
320 [regarding-cluster-of-pneumonia-cases-in-wuhan-china](https://www.who.int/china/news/detail/09-01-2020-who-statement-regarding-cluster-of-pneumonia-cases-in-wuhan-china)). Accessed 3 June 2020.
- 321 23. **The News Minute.** *Screening begins at Bengaluru airport over Coronavirus scare.*  
322 2020([https://www.thenewsminute.com/article/screening-begins-bengaluru-airport-over-](https://www.thenewsminute.com/article/screening-begins-bengaluru-airport-over-coronavirus-scare-116502)  
323 [coronavirus-scare-116502](https://www.thenewsminute.com/article/screening-begins-bengaluru-airport-over-coronavirus-scare-116502)). Accessed 3 June 2020.
- 324 24. **Business Insider.** *No lockdown relaxation in Delhi as all 11 districts are Coronavirus*  
325 *hotspots.* ([https://www.businessinsider.in/india/news/no-lockdown-relaxation-in-delhi-as-all-](https://www.businessinsider.in/india/news/no-lockdown-relaxation-in-delhi-as-all-11-districts-are-coronavirus-hotspots/articleshow/75232679.cms)  
326 [11-districts-are-coronavirus-hotspots/articleshow/75232679.cms](https://www.businessinsider.in/india/news/no-lockdown-relaxation-in-delhi-as-all-11-districts-are-coronavirus-hotspots/articleshow/75232679.cms)). Accessed 2 June 2020.
- 327 25. **The Times of India.** *1,445 cases linked to Tablighi Jamaat event; total cases rise to 4,281,*  
328 *death toll 111.* ([https://timesofindia.indiatimes.com/india/1445-cases-linked-to-tablighi-](https://timesofindia.indiatimes.com/india/1445-cases-linked-to-tablighi-jamaat-event-total-cases-rise-to-4067-death-toll-109/articleshow/75010939.cms)  
329 [jamaat-event-total-cases-rise-to-4067-death-toll-109/articleshow/75010939.cms](https://timesofindia.indiatimes.com/india/1445-cases-linked-to-tablighi-jamaat-event-total-cases-rise-to-4067-death-toll-109/articleshow/75010939.cms)). Accessed 2  
330 June 2020.

331 26. **Bi Q, et al.** Epidemiology and transmission of COVID-19 in 391 cases and 1286 of their  
332 close contacts in Shenzhen, China: a retrospective cohort study. *The Lancet Infectious*  
333 *Diseases* Published online: doi:10.1016/S1473-3099(20)30287-5.

334

335

336

337

338

339

340

341

342

343

344

345

346

347



348 **Figures**

349 Figure 1: Aggregate Network Graphic Created in Gephi

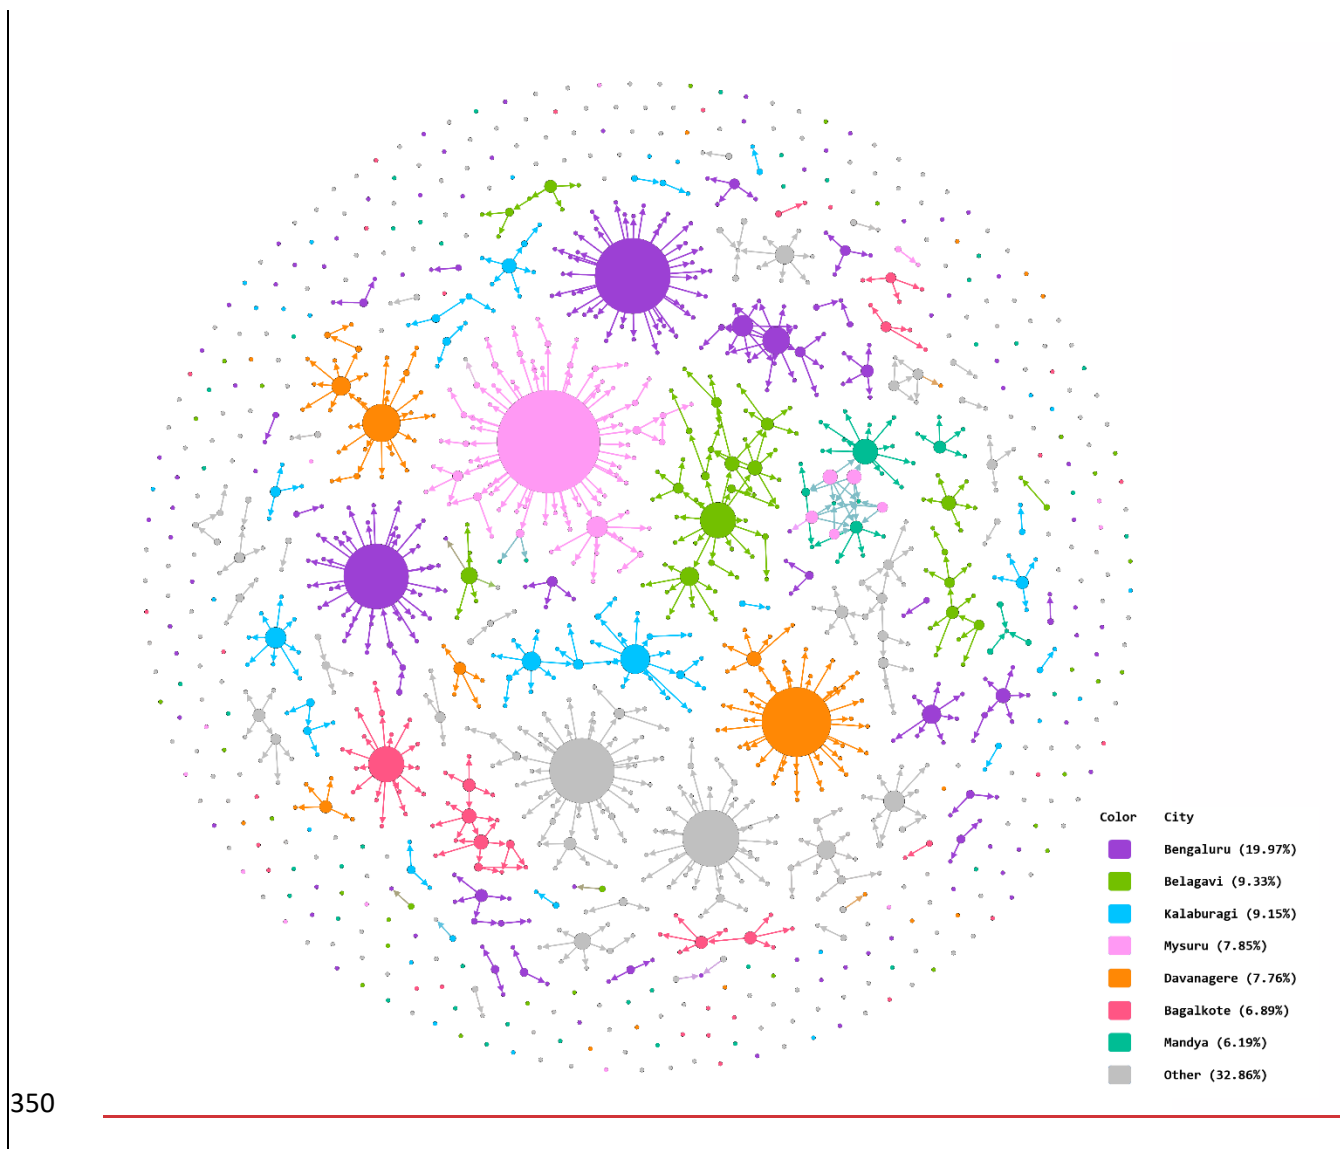

351 Figure 1 legend: Arrowheads indicate direction of transmission from source node to target node.

352 Node size reflects outdegree. Edges inherit color from parent nodes.

353

354

355 Figure 2: Major Network Components Organized by Size, Created in Cytoscape

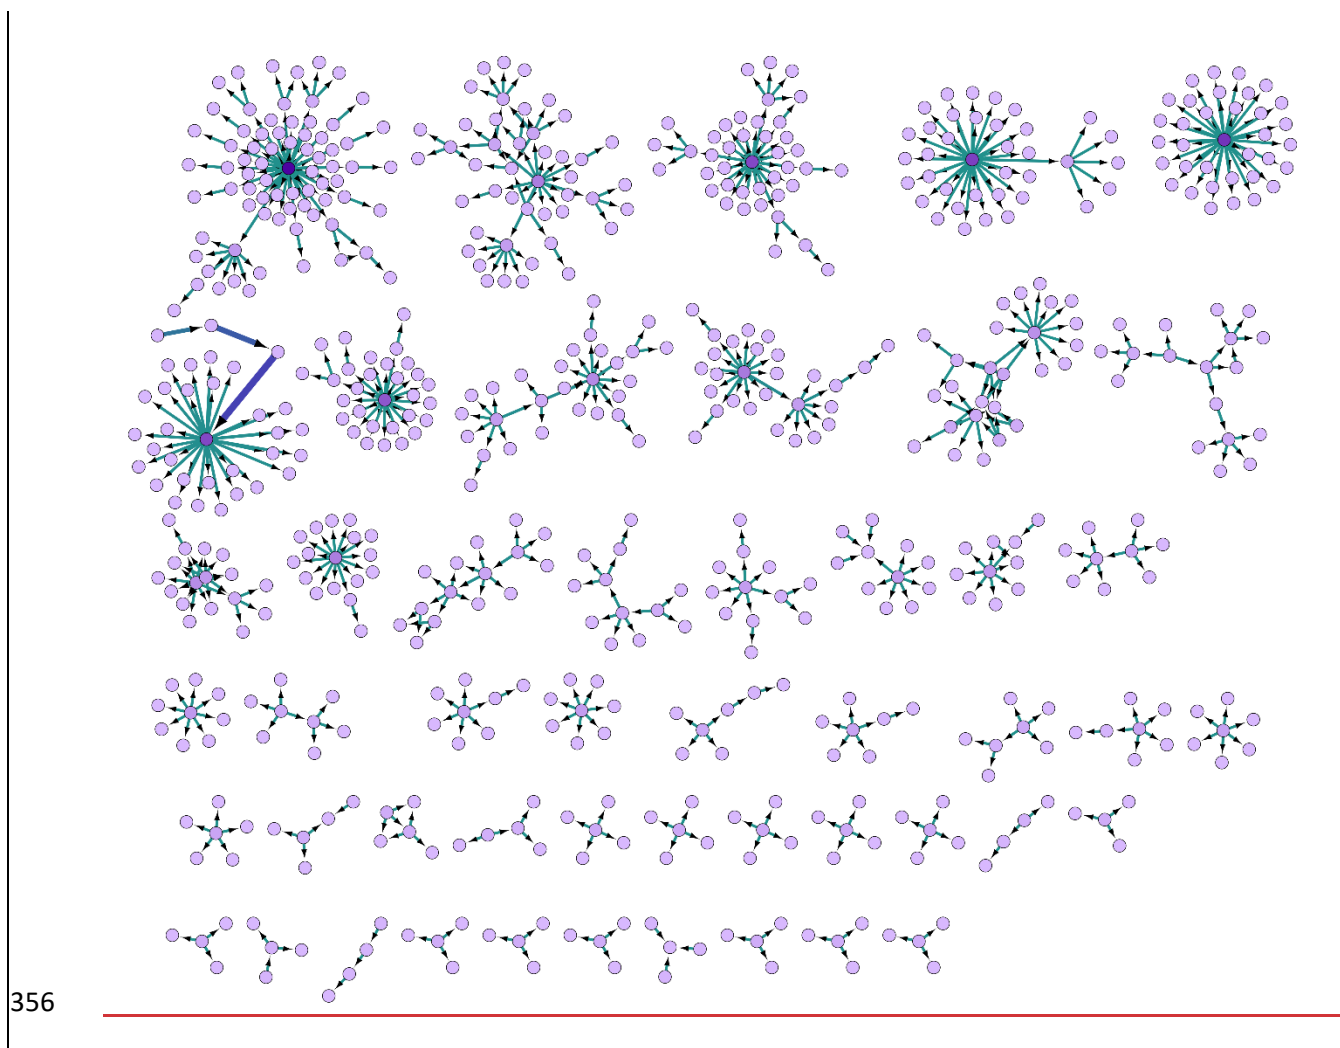

357 Figure 2 legend: Arrowheads indicate direction of transmission from source node to target node.

358 The thickness and color intensity of edges reflect edge betweenness.

359

360

361

362

363 Figure 3: Age-Sex attributes of Nodes and Clusters, Created in Cytoscape

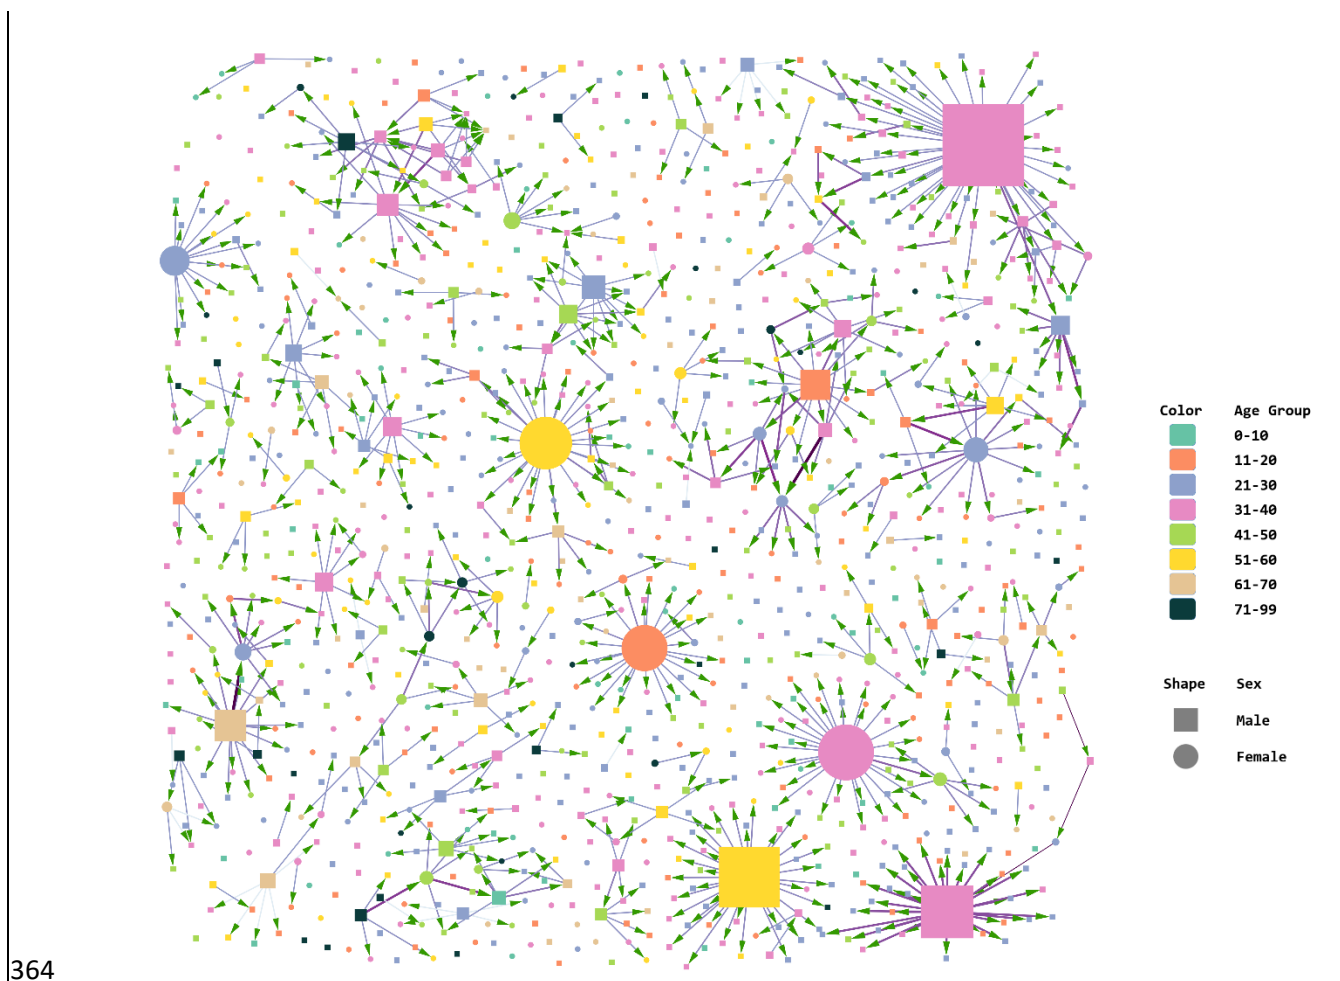

365 Figure 3 legend: Node size indicates outdegree centrality. Arrowheads indicate direction of  
366 transmission from source node to target node. The thickness and color intensity of edges reflect  
367 edge betweenness.

368

369

370

371

372 Figure 4: Network Analysis by Sources of Infection (Cytoscape)

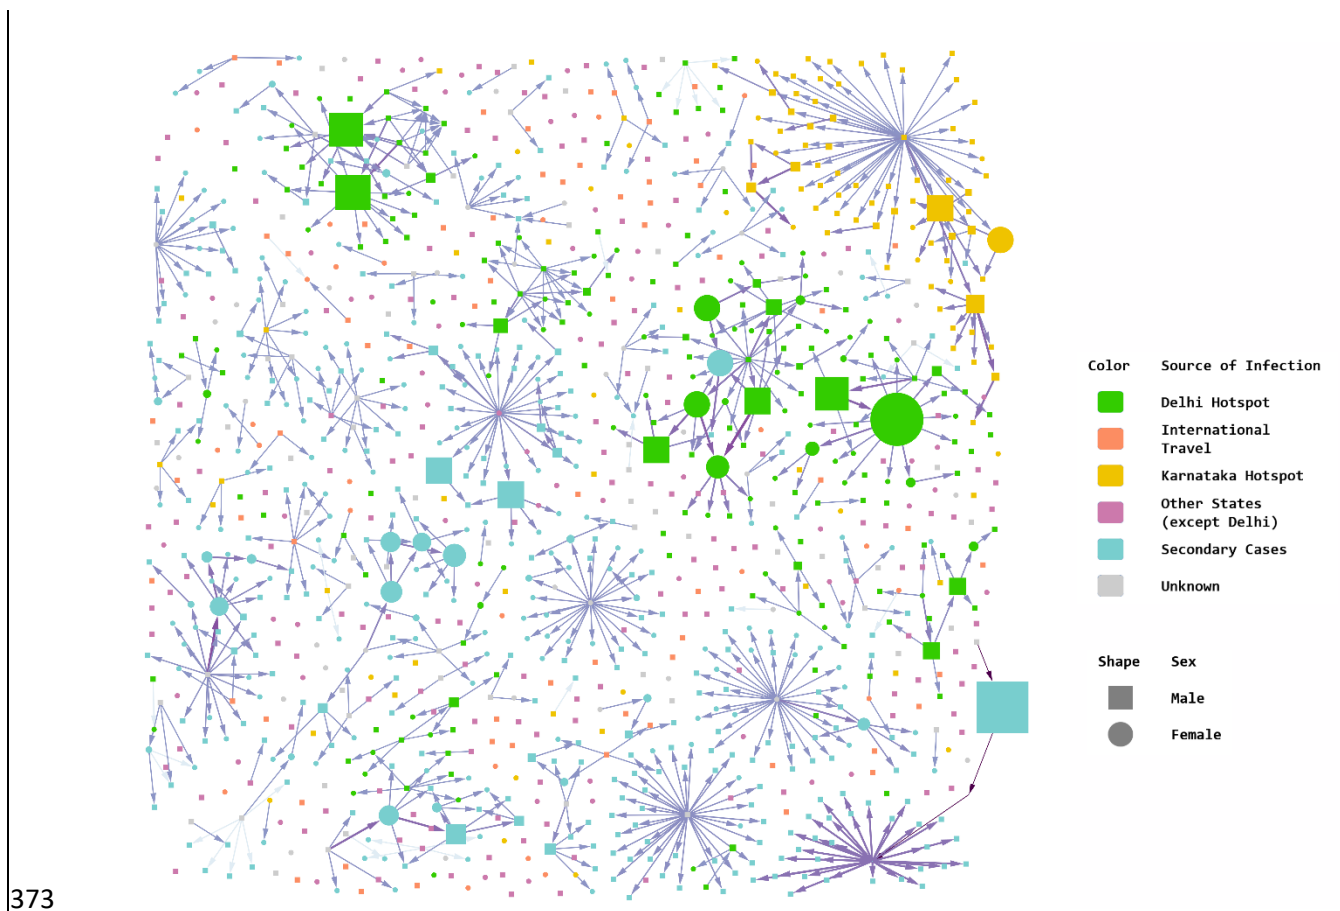

374 Figure 4 legend: Node size indicates betweenness centrality. Arrowheads indicate direction of  
375 transmission from source node to target node. The thickness and color intensity of edges reflect  
376 edge betweenness.

377

378

379

380

381 Figure 5: Comparing the Two Largest Components (Cytoscape)

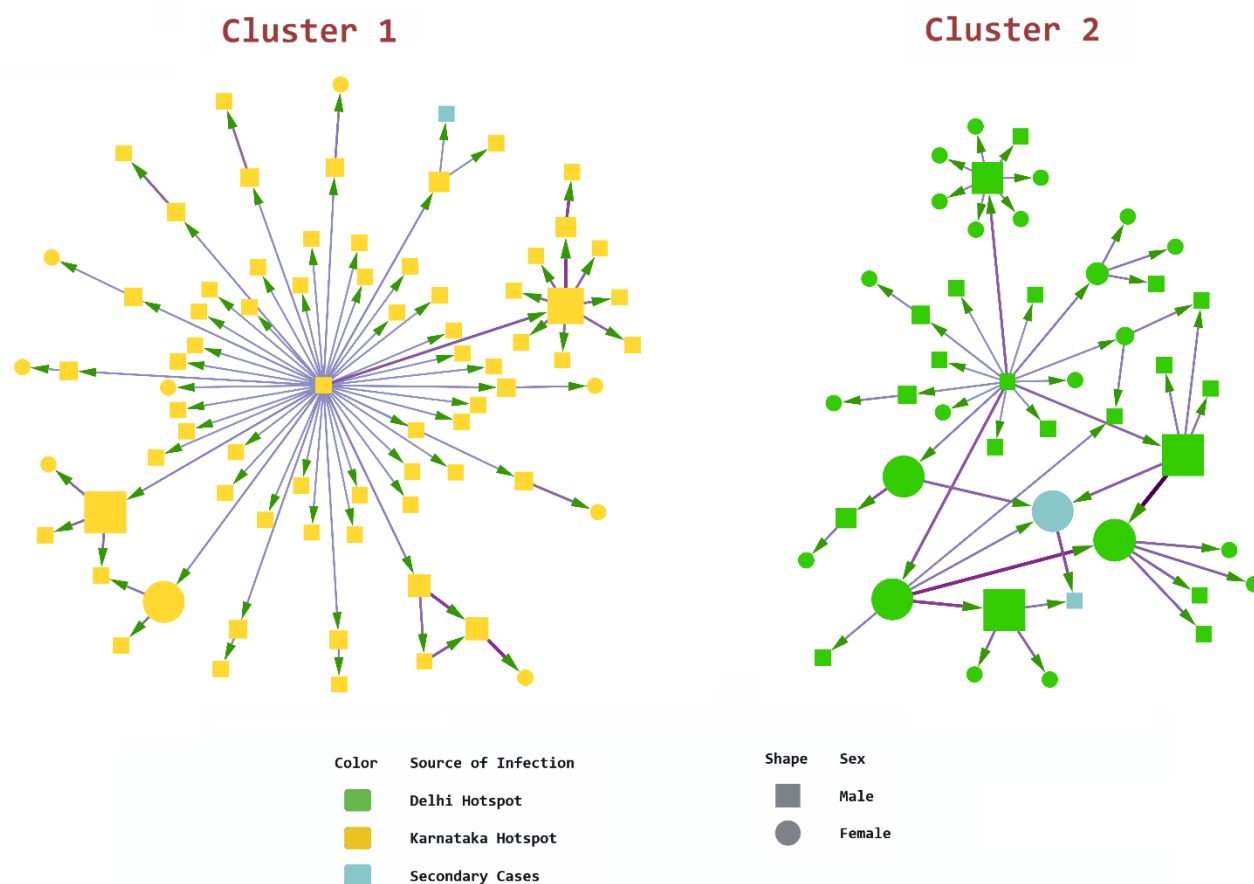

382

383 Figure 5 legend: Node size indicates betweenness centrality. Arrowheads indicate direction of  
384 transmission from source node to target node. The thickness and color intensity of edges reflect  
385 edge betweenness.

386

387

388

389

390 *Epidemiology and Infection*

391

392 **Social Network Analysis of COVID-19 Transmission in Karnataka, India**

393 S. Saraswathi, A. Mukhopadhyay, H. Shah, T.S. Ranganath.

394 *Supplementary Material*

395 **Contents**

|     |                                                                                                  |    |
|-----|--------------------------------------------------------------------------------------------------|----|
| 396 | Figure S1: Age-Sex Distribution of Cases and Deaths.....                                         | 23 |
| 397 | Figure S2a: Network Analysis by Phases of Lockdown (Cytoscape).....                              | 24 |
| 398 | Figure S2b: Time Trend of Cases (March 9 to May 17, 2020).....                                   | 25 |
| 399 | Table S1: Network Parameters .....                                                               | 26 |
| 400 | Table S2: Mean Outdegree and Betweenness by Sex and Age-Group.....                               | 27 |
| 401 | Table S3: District-wise Caseload, and Sources of Infection.....                                  | 28 |
| 402 | Table S4: Distribution of the 37 Largest Case Clusters by District and Source of Infection ..... | 29 |

403

404

405 Figure S1: Age-Sex Distribution of Cases and Deaths

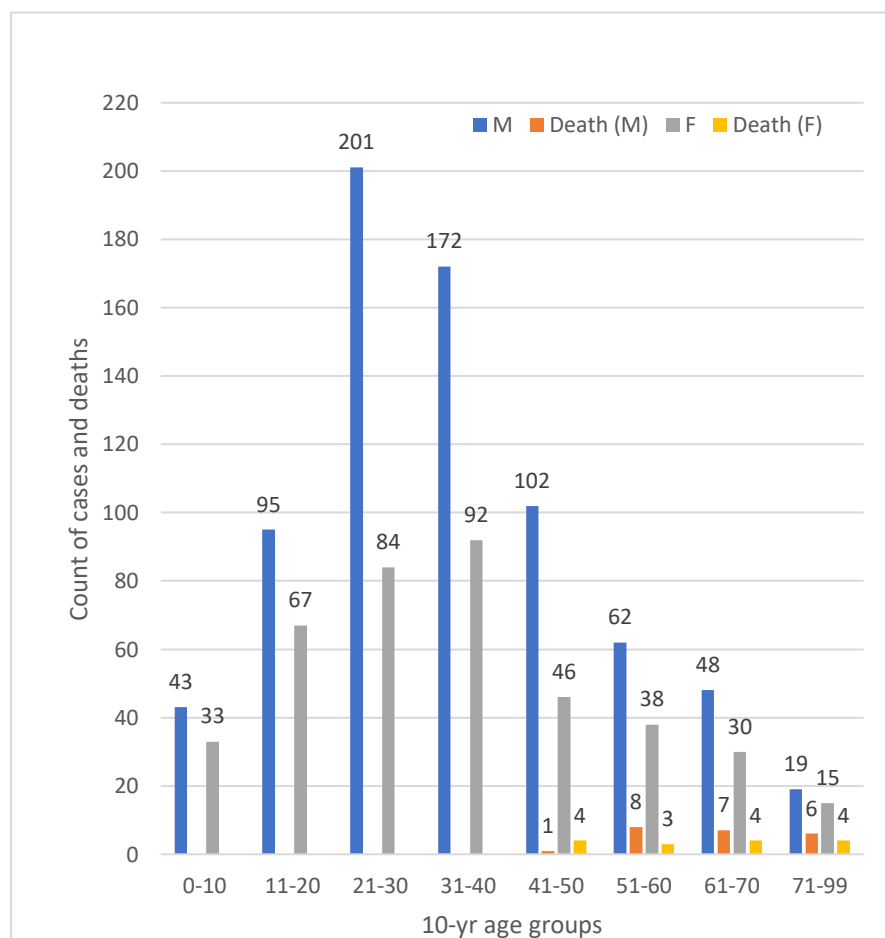

406

407

408

409

410 Figure S2a: Network Analysis by Phases of Lockdown (Cytoscape)

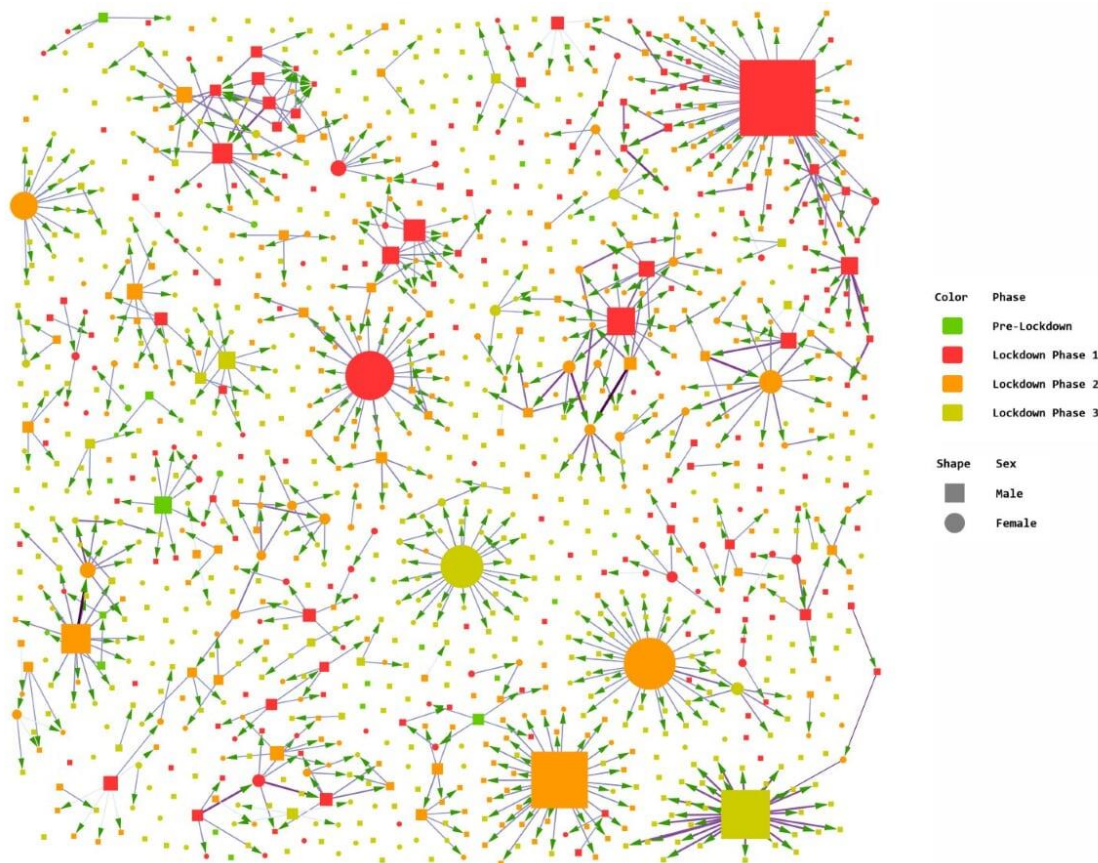

411

412 This figure shows the incidence of clusters during each phase of the preventive lockdown

413 implemented by the government. Phase 1, with the most stringent curbs on travel and

414 socialization, was from March 24 to April 14. The second phase spanned 19 days from April 15

415 to May 3, and the third phase was from May 4 to May 17. Several clusters evolved during the

416 first lockdown phase as those infected in the pre-lockdown period turned symptomatic and tested

417 positive. Many of these clusters comprised returnees from Delhi and their contacts.

418



419 Figure S2b: Trend of Cases (March 9 to May 17, 2020)

420

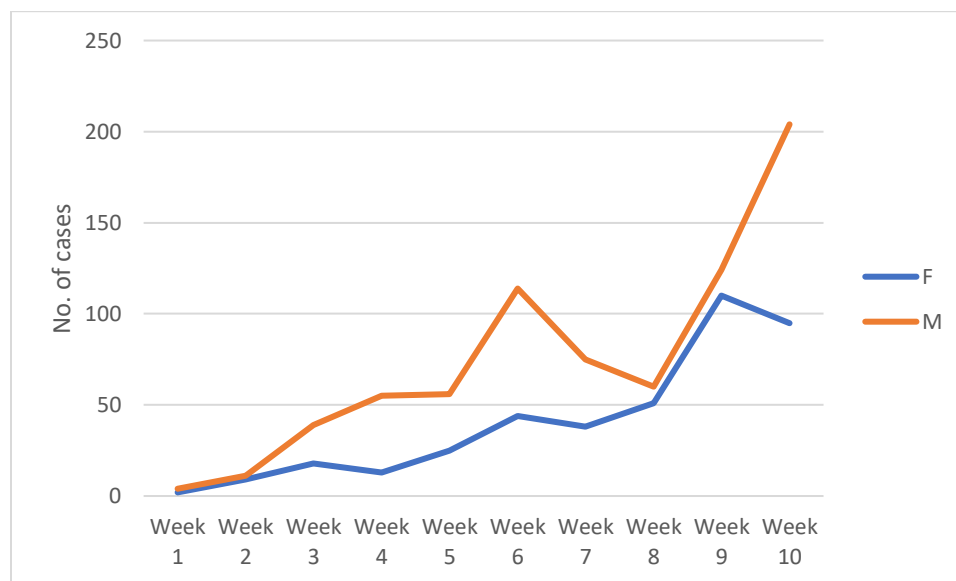

421

422 This graph shows the number of cases detected every week. Week 1 begins on 9 March and  
423 week 10 ends on 17 May 2020. Cases spiked in the second half of April and continued to rise as  
424 lockdown regulations were relaxed and migrant workers returned from other states. However,  
425 these were mostly isolated nodes with few instances of cluster formation (Figure S2a), probably  
426 due to the effective implementation of quarantine measures.

427

428

429

430

431

432

433

434

435 Table S1: Network Parameters

|                           | <b>Network</b>   |             | <b>C1</b>           | <b>C2</b>    |
|---------------------------|------------------|-------------|---------------------|--------------|
| Nodes                     | 1147             |             | 75                  | 45           |
| Edges                     | 706              |             | 76                  | 50           |
| <b>Node attributes</b>    | <b>Range</b>     | <b>Mean</b> | <b>Range (Mean)</b> |              |
| Outdegree                 | 0-47             | 0.616       | 0-47 (1.013)        | 0-15(1.111)  |
| Indegree                  | 0-5              | 0.616       | 0-2 (1.013)         | 0-3 (1.111)  |
| Degree                    | 0-47             | 1.231       | 1-47 (2.027)        | 1-15 (2.222) |
| Betweenness               | 0-87             | 0.469       | 0-9 (0.426)         | 0-12 (1.133) |
| Harmonic Closeness        | 1 (n=143)        | 0.161       | 0-1 (0.231)         | 0-1 (0.263)  |
|                           | >0 and <1 (n=56) |             |                     |              |
|                           | 0 (n=949)        |             |                     |              |
| Eccentricity              | 0-4              | 0.242       | 0-3 (0.307)         | 0-3 (0.4)    |
| <b>Network attributes</b> | <b>Value</b>     |             |                     |              |
| Diameter                  | 4                |             | 3                   | 3            |
| Radius                    | 1                |             | 1                   | 1            |
| Mean path length          | 1.623            |             | 1.321               | 1.314        |
| Mean no. of neighbors     | 1.231            |             | 2.027               | 2.222        |
| Density                   | 0.001            |             | 0.025               | 0.014        |
| Clustering coefficient    | 0.004            |             | 0.011               | 0.000        |

436 C1: Largest component, C2: Second-largest component

437 Table S2: Mean Outdegree and Betweenness by Sex and Age-Group

| <b>Mean outdegree</b>   | <b>F</b>     | <b>M</b>     | <b>Total</b> |
|-------------------------|--------------|--------------|--------------|
| 000-10                  | 0.000        | 0.140        | 0.079        |
| 011-20                  | 0.463        | 0.368        | 0.407        |
| 021-30                  | 0.655        | 0.289        | 0.396        |
| 031-40                  | 0.500        | 0.994        | 0.822        |
| 041-50                  | 0.870        | 0.480        | 0.601        |
| 051-60                  | 1.158        | 1.145        | 1.150        |
| 061-70                  | 0.467        | 1.083        | 0.846        |
| 071-99                  | 0.667        | 1.263        | 1.000        |
| <b>Total</b>            | <b>0.593</b> | <b>0.628</b> | <b>0.616</b> |
|                         |              |              |              |
| <b>Mean betweenness</b> | <b>F</b>     | <b>M</b>     | <b>Total</b> |
| 000-10                  | 0.000        | 0.233        | 0.132        |
| 011-20                  | 0.179        | 0.242        | 0.216        |
| 021-30                  | 1.561        | 0.095        | 0.527        |
| 031-40                  | 0.114        | 1.159        | 0.795        |
| 041-50                  | 0.783        | 0.216        | 0.392        |
| 051-60                  | 0.474        | 0.210        | 0.310        |
| 061-70                  | 0.033        | 0.406        | 0.263        |
| 071-99                  | 1.572        | 0.000        | 0.694        |
| <b>Total</b>            | <b>0.573</b> | <b>0.412</b> | <b>0.469</b> |

439 Table S3: District-wise Caseload, and Sources of Infection

| <b>District</b>      | <b>F</b>   | <b>M</b>   | <b>Total</b> | <b>%</b>      |
|----------------------|------------|------------|--------------|---------------|
| Bengaluru            | 75         | 154        | 229          | 19.97         |
| Belagavi             | 46         | 61         | 107          | 9.33          |
| Kalaburagi           | 45         | 60         | 105          | 9.15          |
| Mysuru               | 11         | 79         | 90           | 7.85          |
| Davanagere           | 37         | 52         | 89           | 7.76          |
| Bagalkote            | 27         | 52         | 79           | 6.89          |
| Mandya               | 24         | 47         | 71           | 6.19          |
| Others               | 140        | 237        | 377          | 32.87         |
| <b>Total</b>         | <b>405</b> | <b>742</b> | <b>1147</b>  | <b>100.00</b> |
| <b>Source type</b>   | <b>F</b>   | <b>M</b>   | <b>Total</b> | <b>%</b>      |
| International travel | 24         | 66         | 90           | 7.85          |
| Domestic travel      | 59         | 150        | 209          | 18.22         |
| Delhi hotspot        | 70         | 130        | 200          | 17.44         |
| Karnataka hotspot    | 23         | 90         | 113          | 9.85          |
| Secondary cases      | 193        | 240        | 433          | 37.75         |
| Unknown              | 36         | 66         | 102          | 8.89          |
| <b>Total</b>         | <b>405</b> | <b>742</b> | <b>1147</b>  | <b>100</b>    |

440

441

442

443

444 Table S4: Distribution of the 37 Largest Clusters by District and Source of Infection  
445

| Source<br>District | Unknown | Karnataka<br>hotspot | Delhi<br>hotspot | Domestic<br>travel | International<br>travel | Total |
|--------------------|---------|----------------------|------------------|--------------------|-------------------------|-------|
| Bengaluru          | 3       | 2                    | 2                |                    | 1                       | 8     |
| Belagavi           |         |                      | 5                |                    |                         | 5     |
| Kalaburagi         | 3       |                      | 1                | 1                  |                         | 5     |
| Mysuru             |         | 1                    |                  |                    |                         | 1     |
| Davanagere         | 5       |                      |                  |                    |                         | 5     |
| Bagalkote          | 3       |                      |                  |                    |                         | 3     |
| Mandya             |         |                      | 1                |                    |                         | 1     |
| Others             | 5       |                      | 3                | 1                  |                         | 9     |
| Total              | 19      | 3                    | 12               | 2                  | 1                       | 37    |

446 Cell values indicate count of clusters.

447 Bengaluru, the major transit point for international passengers, had only one cluster traced to a  
448 returnee from abroad. It is notable that 11 of the 37 clusters (29.73%) originated in Delhi. All the  
449 Belagavi clusters (including the 2<sup>nd</sup> largest cluster with 45 nodes) were traced to travelers from  
450 Delhi.

451

452

453

454

455
